# Supplementary material for: Dynamic Intestinal Stem Cell Plasticity and Lineage Remodeling by a Nutritional Environment Relevant to Human Risk for Tumorigenesis
Source: PubMed Central journal article supplement — Mol Cancer Res. 2023 Apr 25;21(8):808–24. doi: 10.1158/1541-7786.MCR-22-1000 (PMC10390890; doi:10.1158/1541-7786.mcr-22-1000), 2023-04-25
Supplement: mcr-22-1000_figure_s2_suppsf2.pdf [file mcr-22-1000_figure_s2_suppsf2.pdf]

**Fig S2****3 months  
NWD1 v AIN****12 months  
NWD1 v AIN****12 month  
cross over back  
to AIN**

| <u>Pathway</u>              | NES  | P      | FDR   | NES  | P      | FDR   | NES   | P      | FDR   |
|-----------------------------|------|--------|-------|------|--------|-------|-------|--------|-------|
| RIBOSOME                    | 3.19 | ≤0.001 | 0.000 | 3.10 | ≤0.001 | 0.000 | -3.13 | ≤0.001 | 0.000 |
| DNA REPLICATION             | 2.41 | ≤0.001 | 0.000 | 2.26 | ≤0.001 | 0.000 | -2.47 | ≤0.001 | 0.000 |
| SPLICEOSOME                 | 2.34 | ≤0.001 | 0.000 | 2.08 | ≤0.001 | 0.000 | -2.34 | ≤0.001 | 0.000 |
| RNA_POLYMERASE              | 2.19 | ≤0.001 | 0.000 | 1.88 | ≤0.001 | 0.001 | -2.00 | ≤0.001 | 0.001 |
| MISMATCH_REPAIR             | 2.13 | ≤0.001 | 0.000 | 2.14 | ≤0.001 | 0.000 | -2.21 | ≤0.001 | 0.000 |
| CELL_CYCLE                  | 1.97 | ≤0.001 | 0.001 | 1.91 | ≤0.001 | 0.001 | -2.08 | ≤0.001 | 0.000 |
| NUCLEOTIDE EXCISION REPAIR  | 1.83 | ≤0.001 | 0.006 | 1.90 | ≤0.001 | 0.001 | -1.78 | 0.003  | 0.009 |
| PURINE METABOLISM           | 1.74 | ≤0.001 | 0.015 | 1.60 | ≤0.001 | 0.038 | -1.54 | 0.002  | 0.079 |
| OOCYTE MEIOSIS              | 1.73 | 0.002  | 0.016 | 1.42 | 0.030  | 0.160 | -1.26 | 0.091  | 0.333 |
| PYRIMIDINE METABOLISM       | 1.72 | ≤0.001 | 0.015 | 1.80 | ≤0.001 | 0.003 | -1.67 | ≤0.001 | 0.026 |
| BASE EXCISION REPAIR        | 1.68 | 0.004  | 0.020 | 2.09 | ≤0.001 | 0.000 | -1.99 | ≤0.001 | 0.001 |
| RNA DEGRADATION             | 1.68 | ≤0.001 | 0.019 | 1.63 | 0.006  | 0.031 | -1.36 | 0.078  | 0.213 |
| LINOLEIC ACID METABOLISM    | 1.66 | 0.004  | 0.020 | 1.46 | 0.062  | 0.153 |       |        |       |
| ARACHIDONIC ACID METABOLISM | 1.59 | 0.015  | 0.038 |      |        |       |       |        |       |
| WNT SIGNALING PATHWAY       | 1.52 | ≤0.001 | 0.063 |      |        |       |       |        |       |

| <u>Pathway</u>                      | NES   | P      | FDR    | NES   | P      | FDR    | NES  | P      | FDR    |
|-------------------------------------|-------|--------|--------|-------|--------|--------|------|--------|--------|
| ABC TRANSPORTERS                    | -2.34 | ≤0.001 | ≤0.001 | -1.98 | ≤0.001 | 0.006  | 1.85 | ≤0.001 | 0.010  |
| CITRATE CYCLE -TCA CYCLE            | -2.28 | ≤0.001 | ≤0.001 | -2.02 | ≤0.001 | 0.006  | 2.01 | ≤0.001 | 0.002  |
| PEROXISOME                          | -2.20 | ≤0.001 | ≤0.001 |       | ≤0.001 |        |      | ≤0.001 | ≤0.001 |
| OXIDATIVE PHOSPHORYLATION           | -2.19 | ≤0.001 | ≤0.001 | -2.37 | ≤0.001 | ≤0.001 | 2.11 | ≤0.001 | 0.001  |
| PARKINSONS DISEASE                  | -2.14 | ≤0.001 | ≤0.001 | -2.12 | ≤0.001 | 0.002  | 1.93 | ≤0.001 | 0.004  |
| PPAR SIGNALING PATHWAY              | -2.10 | ≤0.001 | ≤0.001 |       | ≤0.001 |        |      |        |        |
| FATTY ACID METABOLISM               | -2.08 | ≤0.001 | ≤0.001 |       | ≤0.001 |        |      |        |        |
| GLYCOLYSIS GLUCONEOGENESIS          | -2.07 | ≤0.001 | ≤0.001 | -2.03 | ≤0.001 | 0.005  |      |        |        |
| RETINOL METABOLISM                  | -2.07 | ≤0.001 | ≤0.001 |       | ≤0.001 |        |      |        |        |
| ALZHEIMERS DISEASE                  | -2.02 | ≤0.001 | ≤0.001 | -2.17 | ≤0.001 | ≤0.001 | 1.95 | ≤0.001 | 0.004  |
| FRUCTOSE/MANNOSE METABOLISM         | -1.98 | ≤0.001 | ≤0.001 | -2.32 | ≤0.001 | ≤0.001 | 2.28 | ≤0.001 | ≤0.001 |
| AMINO SUGAR/NUCLEOTIDE SUGAR METAB. | -1.92 | 0.002  | 0.002  |       |        |        | 1.72 | 0.010  | 0.023  |
| GLYOXYLATE/DICARBOXYLATE METAB      | -1.85 | 0.006  | 0.006  |       |        |        |      |        |        |
| SPHINGOLIPID METABOLISM             | -1.84 | ≤0.001 | 0.006  |       |        |        | 1.89 | 0.005  | 0.008  |
| BUTANOATE METABOLISM                | -1.82 | 0.002  | 0.006  |       |        |        |      |        |        |
| OTHER GLYCAN DEGRADATION            | -1.80 | 0.008  | 0.008  | -1.53 | 0.058  | 0.133  | 2.12 | ≤0.001 | ≤0.001 |
| PENTOSE PHOSPHATE PATHWAY           | -1.78 | 0.004  | 0.010  | -1.48 | 0.033  | 0.138  |      |        |        |
