# Supplementary material for: Dynamic Intestinal Stem Cell Plasticity and Lineage Remodeling by a Nutritional Environment Relevant to Human Risk for Tumorigenesis
Source: PubMed Central journal article supplement — Mol Cancer Res. 2023 Apr 25;21(8):808–24. doi: 10.1158/1541-7786.MCR-22-1000 (PMC10390890; doi:10.1158/1541-7786.mcr-22-1000), 2023-04-25

**Fig S4**

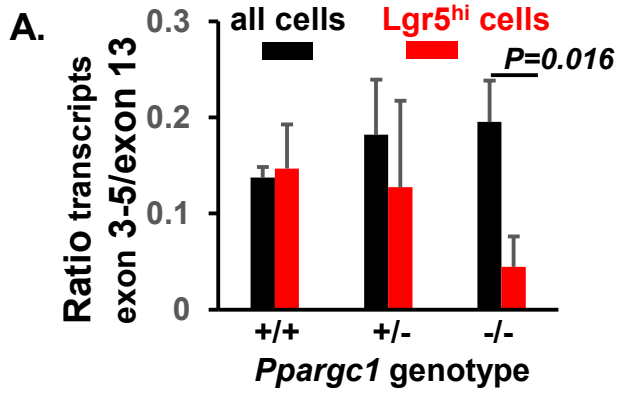

**B. Trajectory, *Ppargc1a* inactivation**

**Cps1**  
villus bottom

**Slc2a2**  
mid-upper

**Slc28a2**  
villus tip

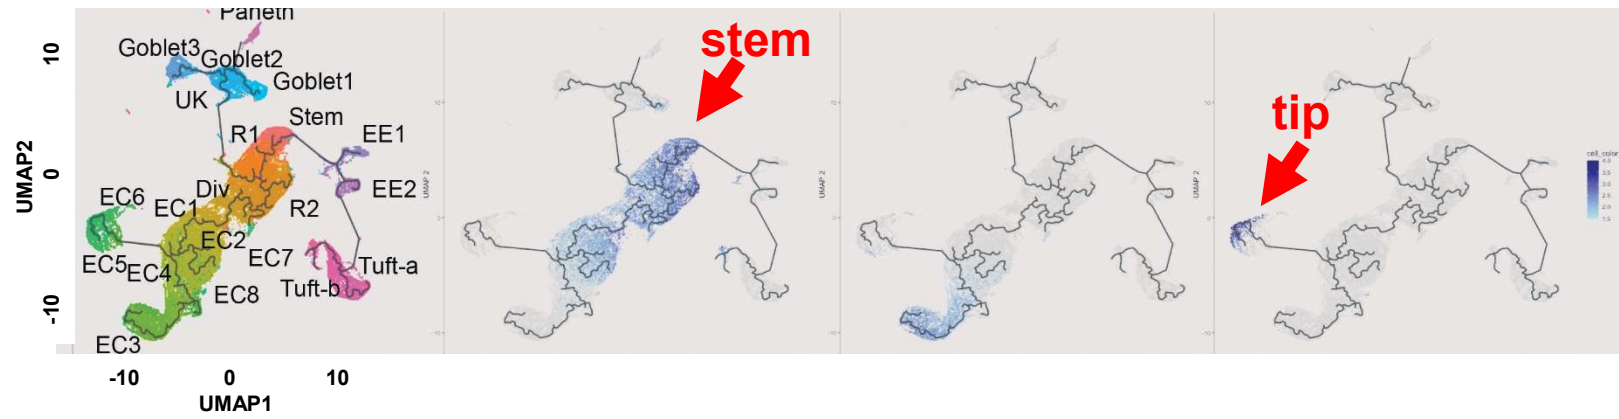

**C. Trajectory, 4d dietary cross-over**

**Cps1**  
villus bottom

**Slc2a2**  
mid-upper

**Slc28a2**  
villus tip

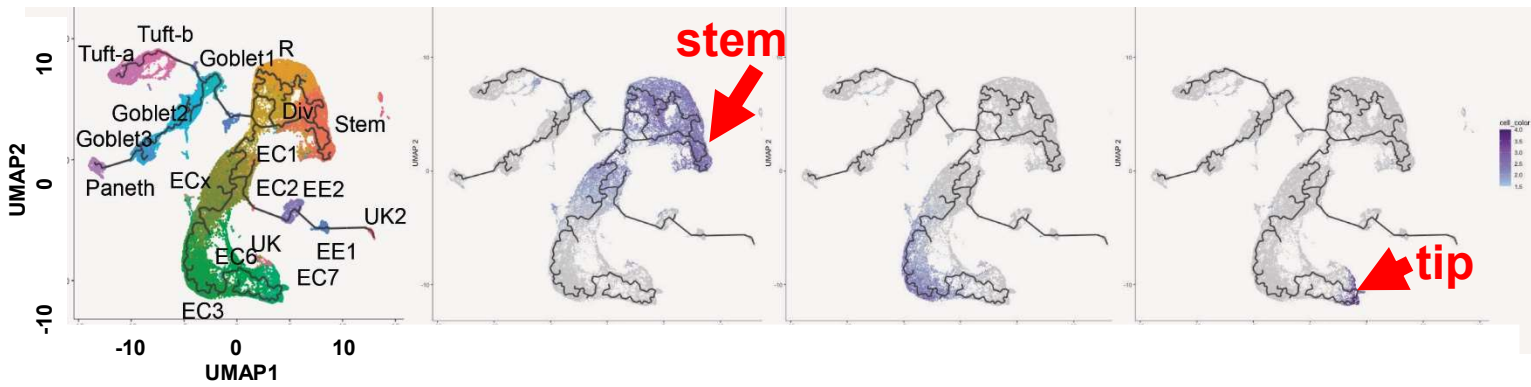

**D. Trajectory, *Bmi1*<sup>+</sup> cells**

**Cps1**  
villus bottom  
stem

**Slc2a2**  
mid-upper

**Slc28a2**  
villus tip

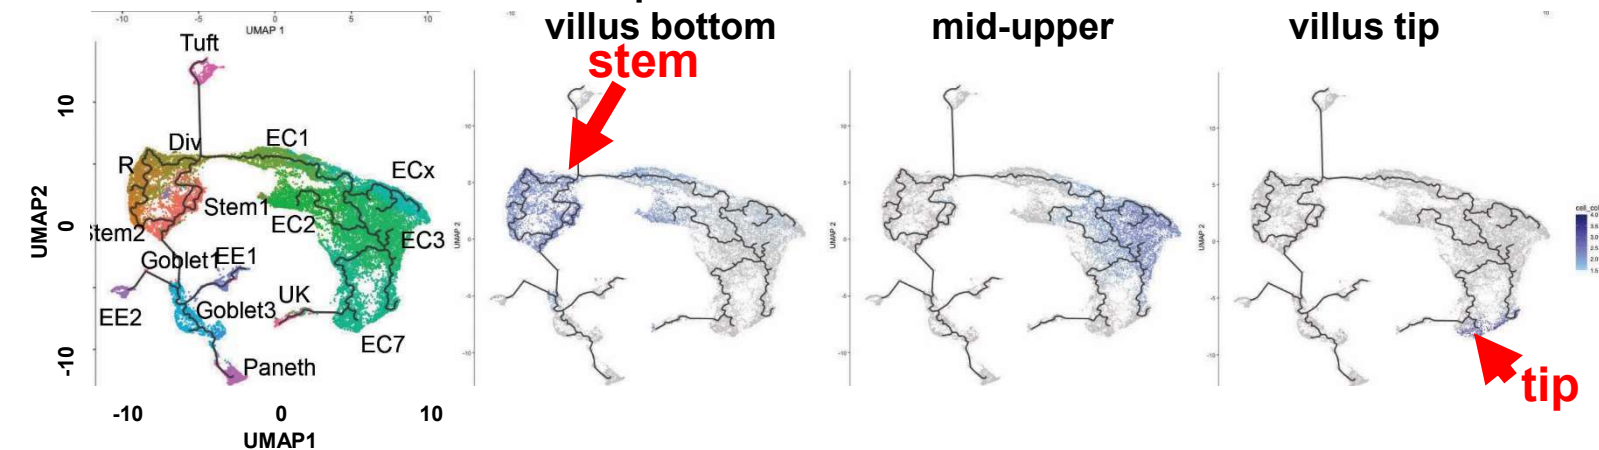

Supplement: mcr-22-1000_figure_s4_suppsf4.pdf [file mcr-22-1000_figure_s4_suppsf4.pdf]
