# Supplementary material for: Dynamic Intestinal Stem Cell Plasticity and Lineage Remodeling by a Nutritional Environment Relevant to Human Risk for Tumorigenesis
Source: PubMed Central journal article supplement — Mol Cancer Res. 2023 Apr 25;21(8):808–24. doi: 10.1158/1541-7786.MCR-22-1000 (PMC10390890; doi:10.1158/1541-7786.mcr-22-1000), 2023-04-25

**Cell Clusters, *Bmi1* Cells**

**A**

**scRNAseq libraries**

| diet (3mo) | days post-TAM |                     |
|------------|---------------|---------------------|
| NWD1       | 3             | <b>shorter term</b> |
| NWD1       | 3             |                     |
| AIN76A     | 3             |                     |
| AIN76A     | 3             |                     |
| NWD1       | 66            | <b>longer term</b>  |
| NWD1       | 70            |                     |
| AIN76A     | 66            |                     |
| AIN76A     | 70            |                     |

**B**

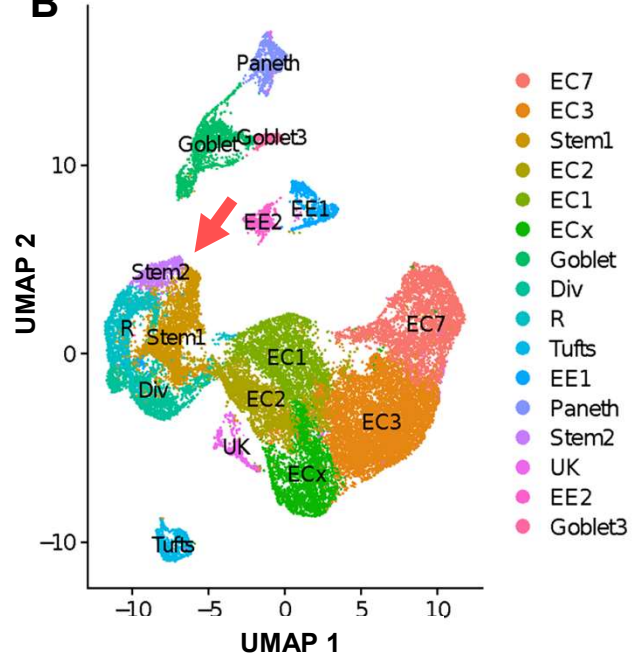

**C**

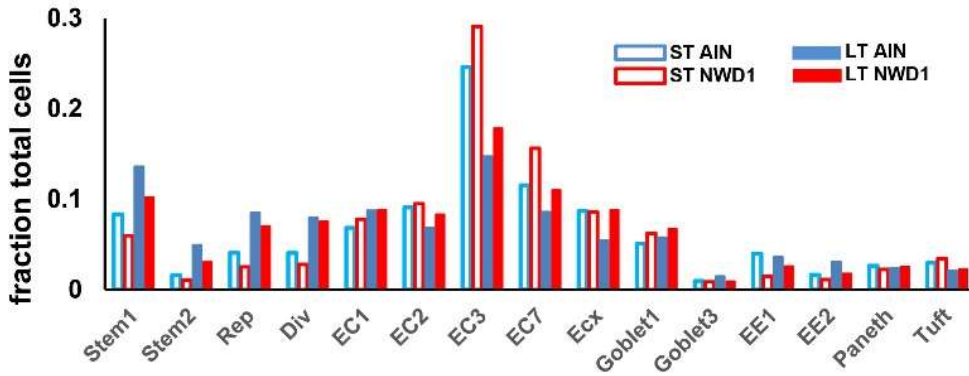

**D**

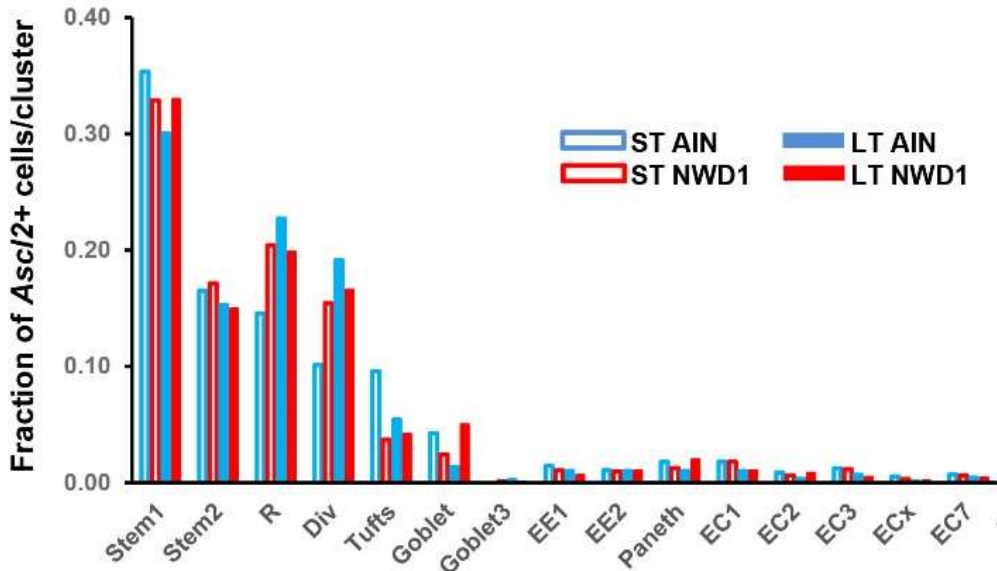

Supplement: mcr-22-1000_figure_s6_suppsf6.pdf [file mcr-22-1000_figure_s6_suppsf6.pdf]
