# Supplementary figures and images for: Dynamic Intestinal Stem Cell Plasticity and Lineage Remodeling by a Nutritional Environment Relevant to Human Risk for Tumorigenesis
Source: PubMed Central journal article supplement — Mol Cancer Res. 2023 Apr 25;21(8):808–24. doi: 10.1158/1541-7786.MCR-22-1000 (PMC10390890; doi:10.1158/1541-7786.mcr-22-1000), 2023-04-25

**Fig. S1**

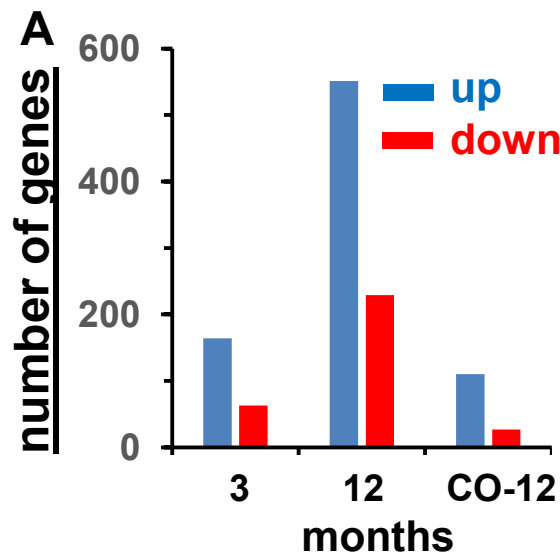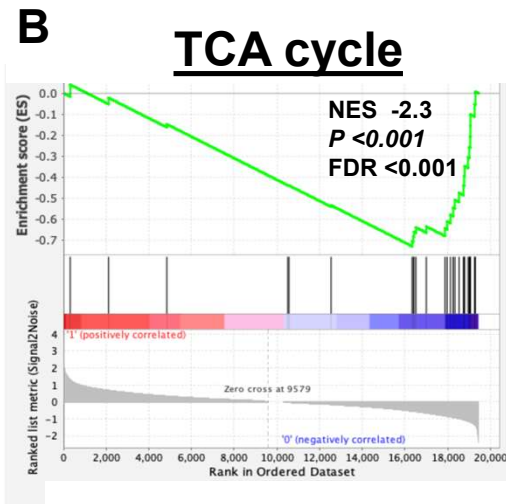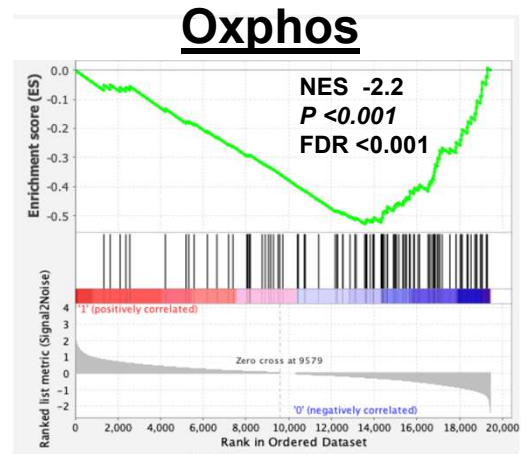

NWD1 3Mo  
vs  
AIN76A 3Mo

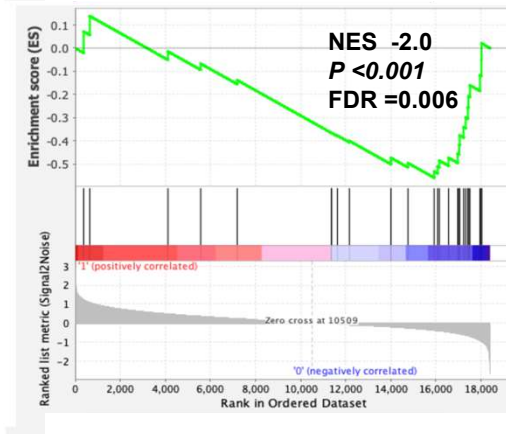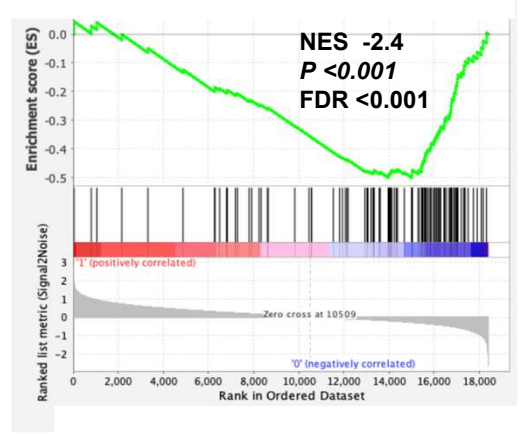

NWD1 12Mo  
vs  
AIN76A 12Mo

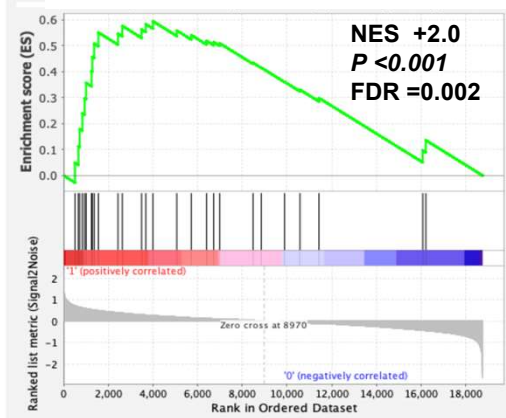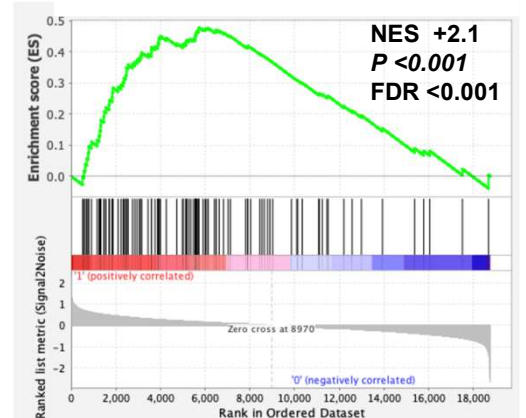

AIN76A crossover  
12Mo vs  
NWD1 12Mo

Enrichment Profile ———  
Gene Hits ———

Supplement: mcr-22-1000_figure_s1_suppsf1.pdf [file mcr-22-1000_figure_s1_suppsf1.pdf]

**Fig. S3**

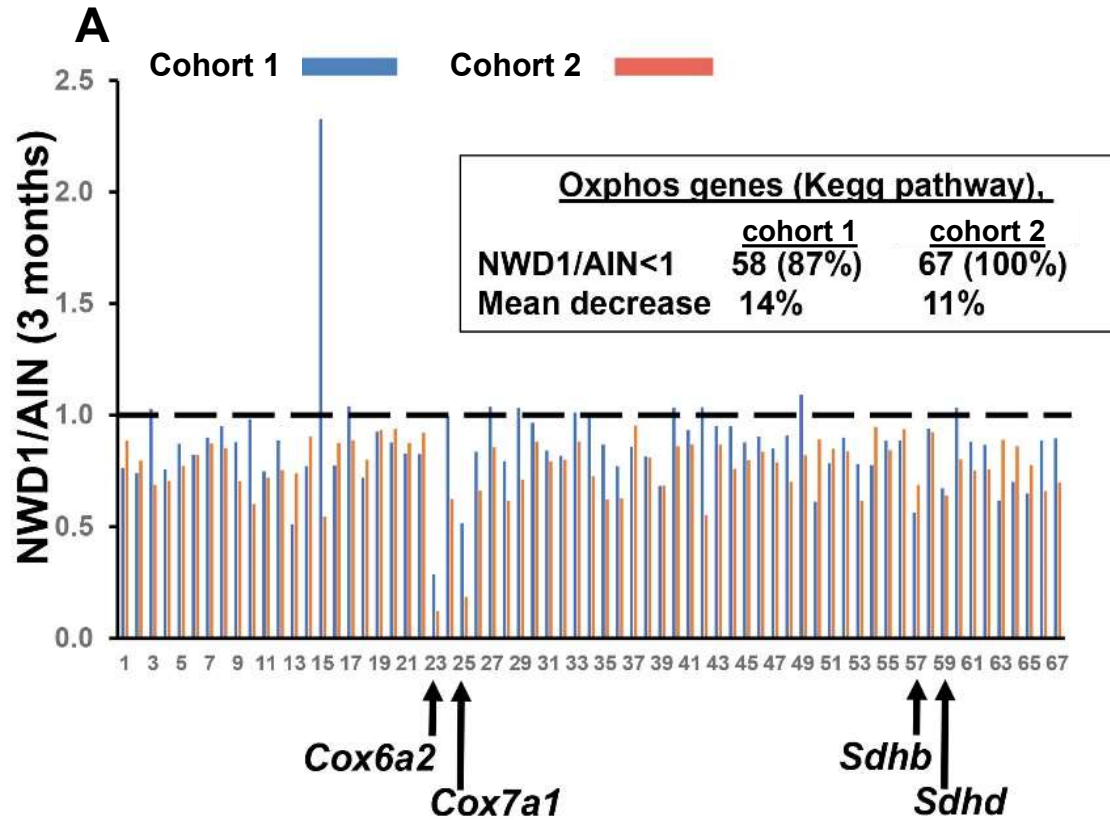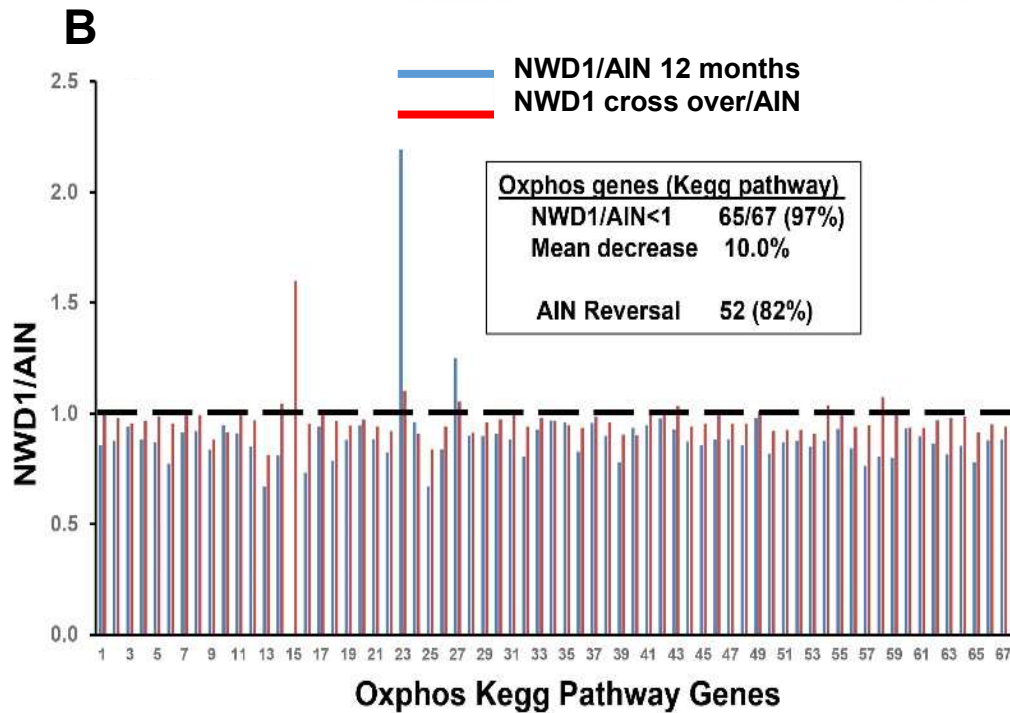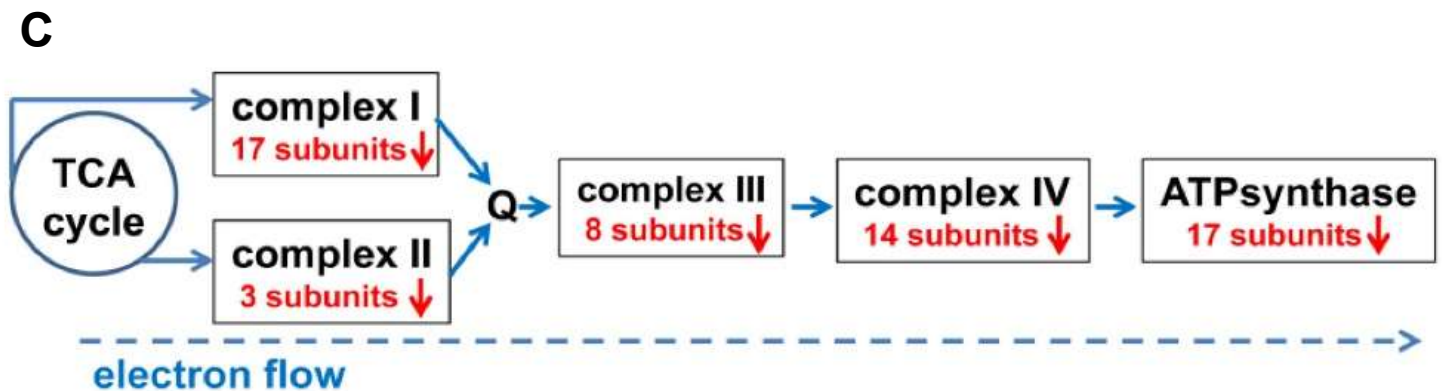

Supplement: mcr-22-1000_figure_s3_suppsf3.pdf [file mcr-22-1000_figure_s3_suppsf3.pdf]

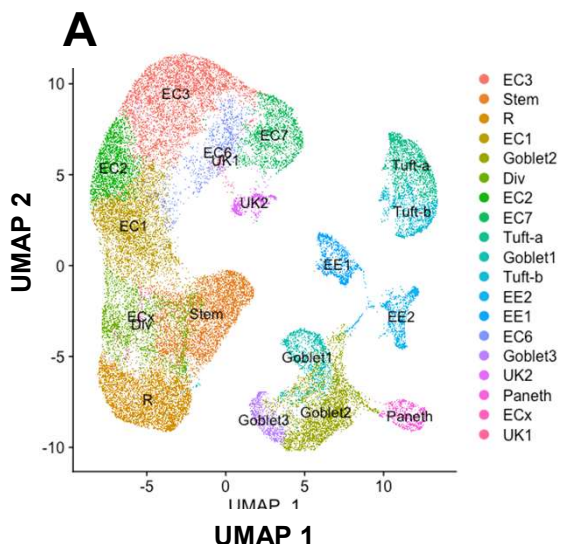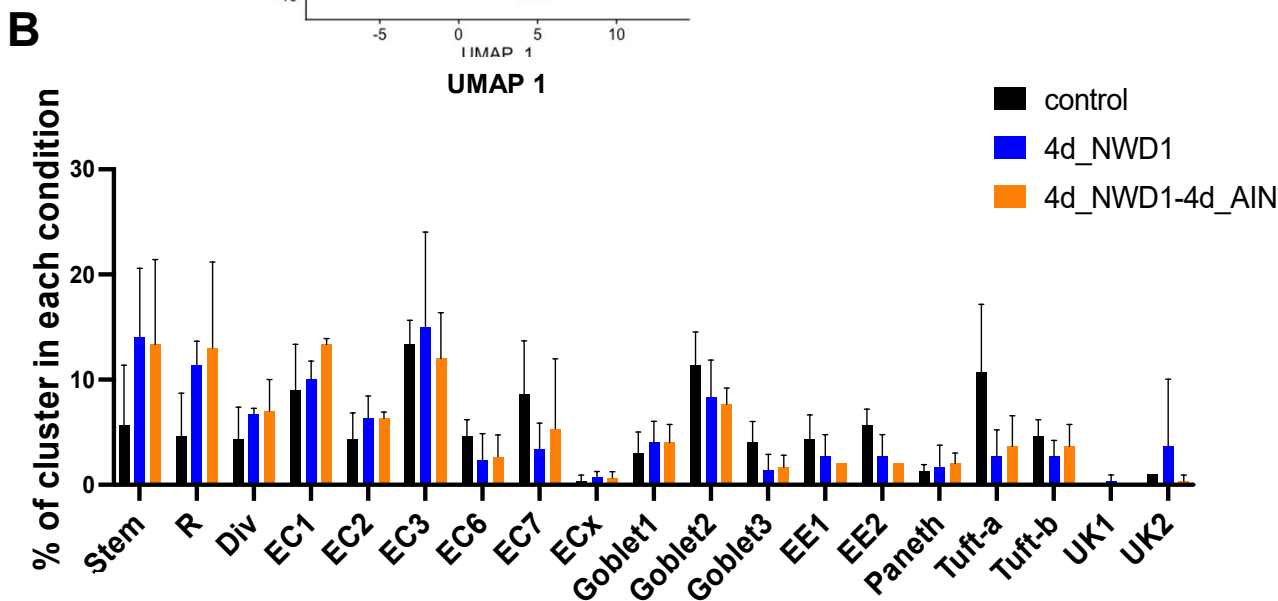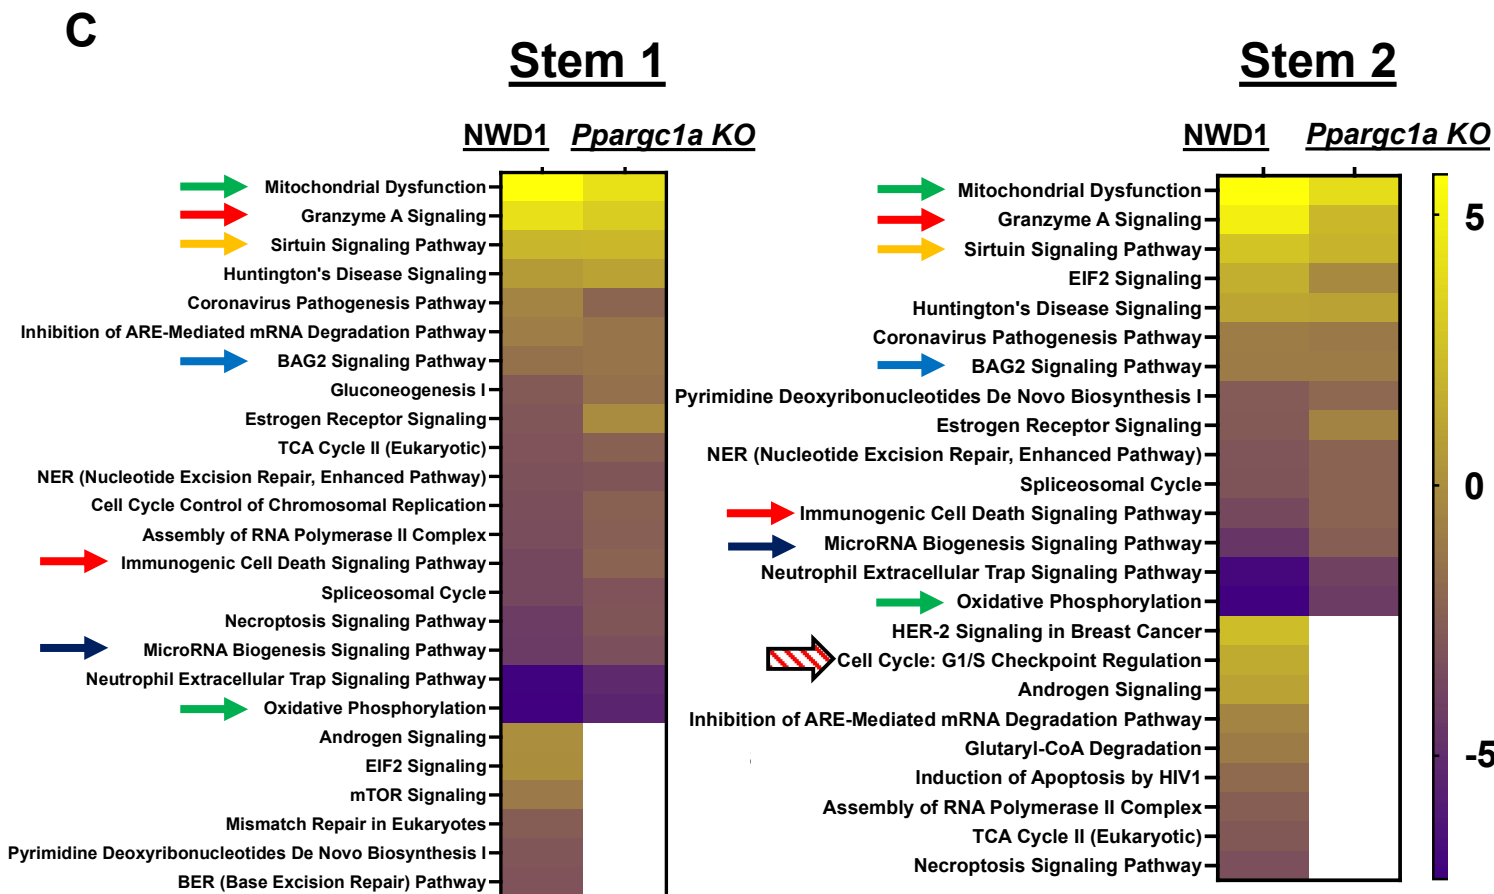

Supplement: mcr-22-1000_figure_s5_suppsf5.pdf [file mcr-22-1000_figure_s5_suppsf5.pdf]

**Fig S7**

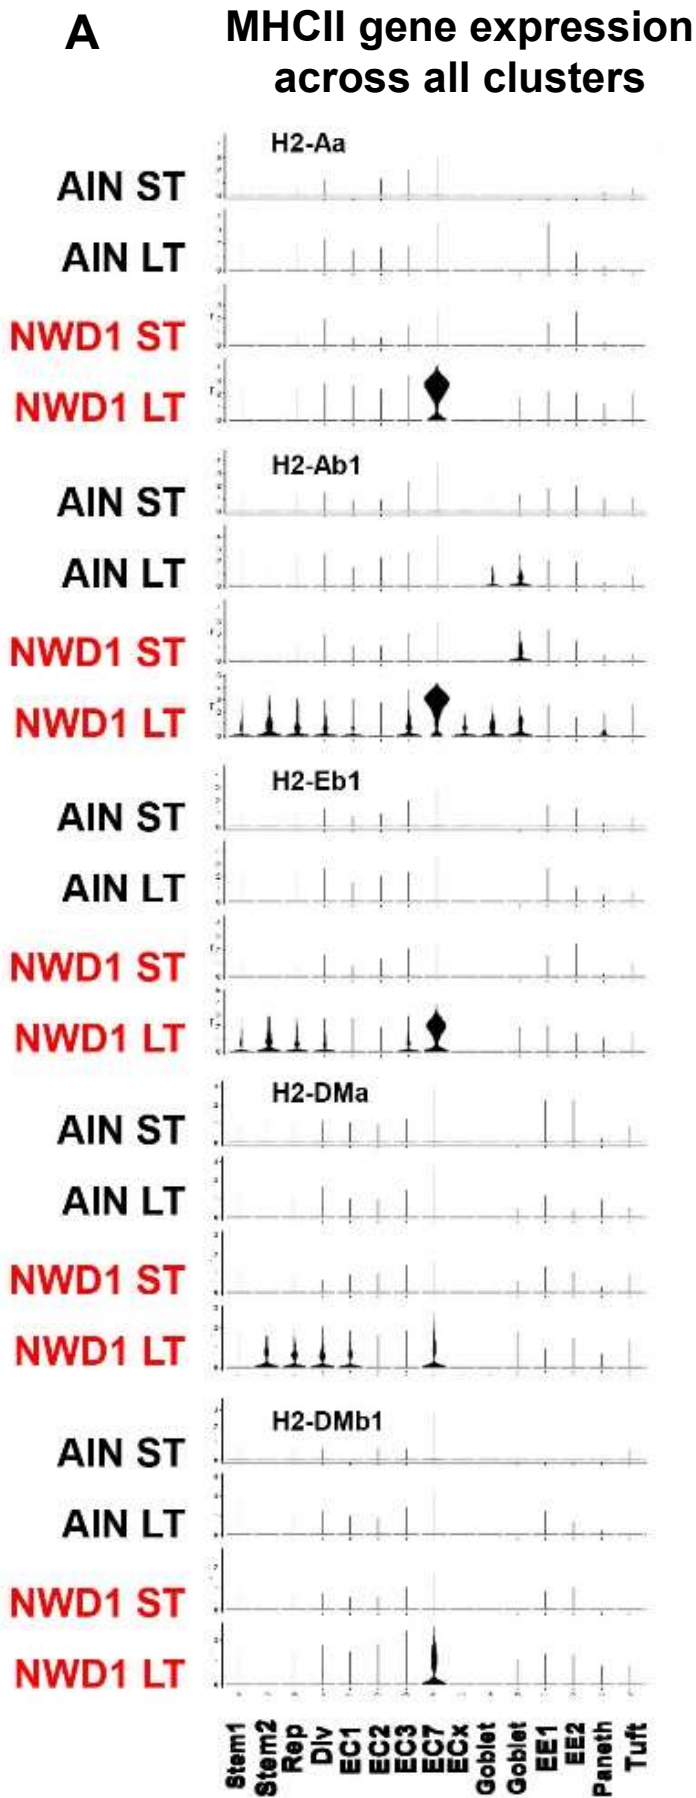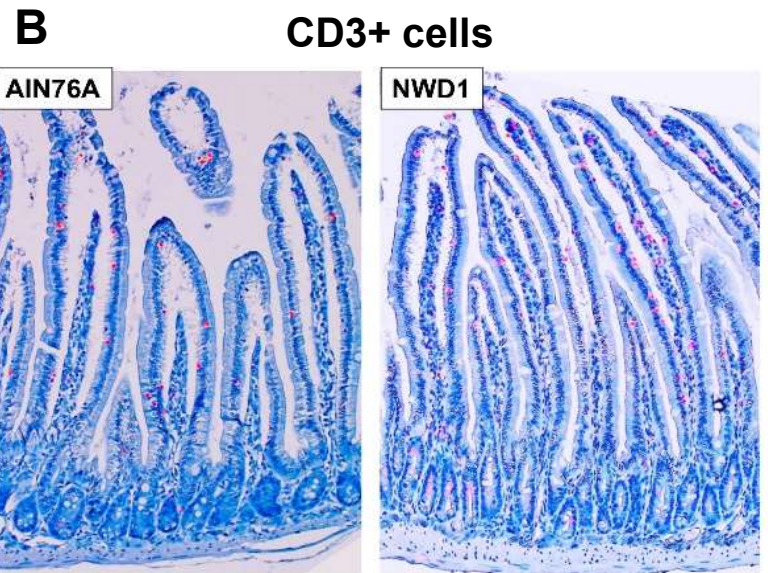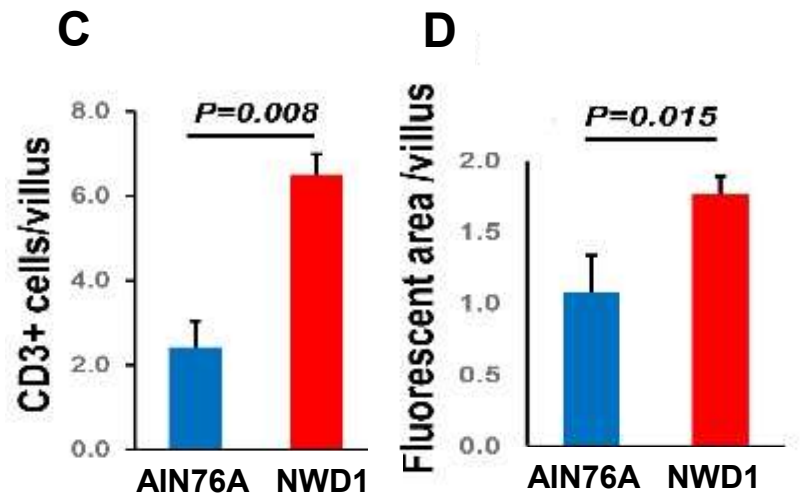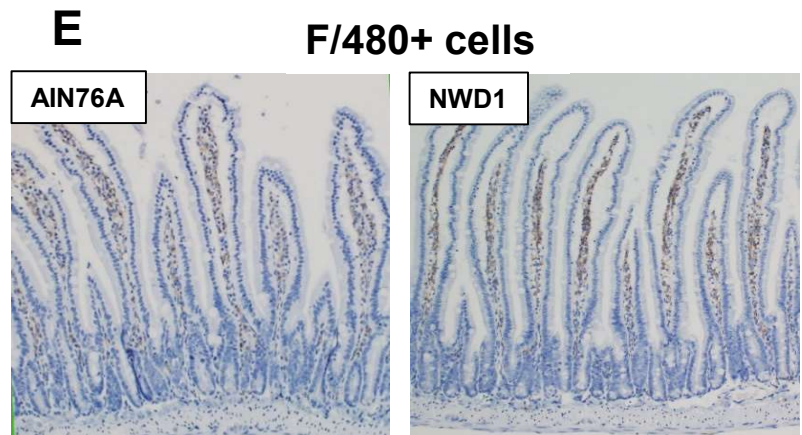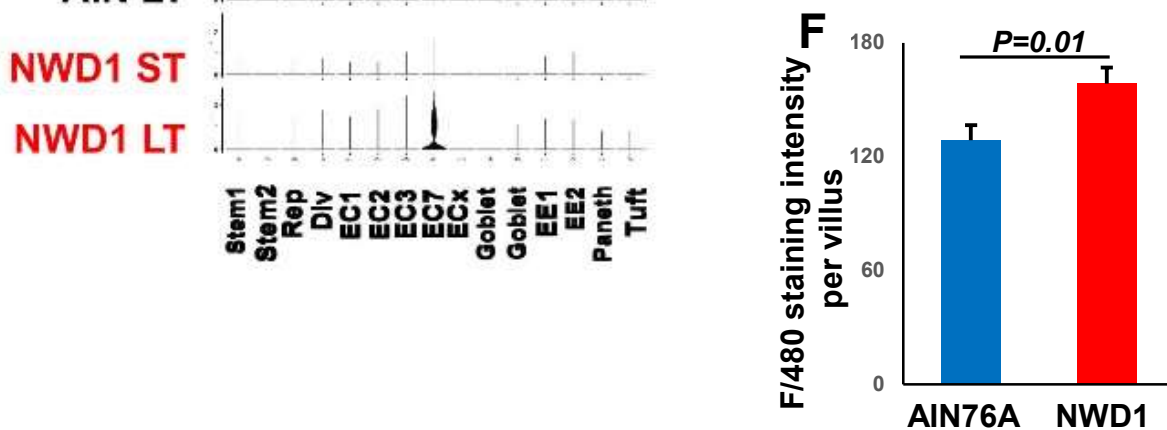

Supplement: mcr-22-1000_figure_s7_suppsf7.pdf [file mcr-22-1000_figure_s7_suppsf7.pdf]
